# Supplementary material for: Chromium Contamination and Health Risk Assessment of Soil and Agricultural Products in a Rural Area in Southern China
Source: MDPI journal article supplement (doi:10.3390/toxics11010027), 2022-12-27
Supplement: s1 [file s1]

# Supplementary Materials: Chromium Contamination and Health Risk Assessment of Soil and Agricultural Products in a Rural Area in Southern China

Shun'an Xu, Chao Yu, Qiong Wang, Jiaoyuan Liao, Chanjuan Liu, Lukuan Huang, Qizhen Liu, Zheyu Wen and Ying Feng

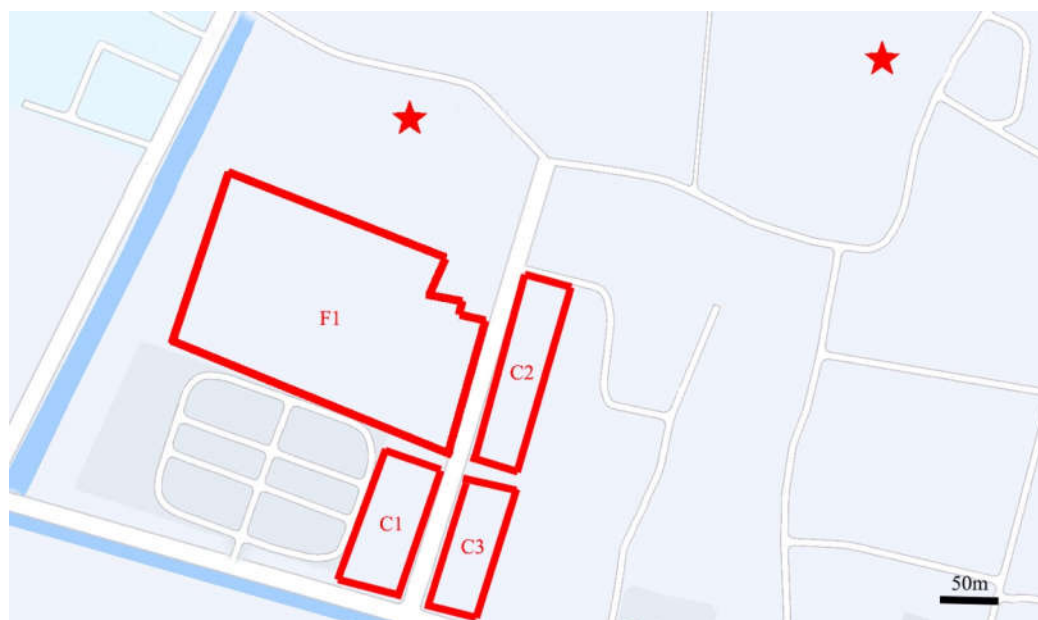

**Figure S1.** Sketch map of research area in Ningbo City. The areas outlined in the red line is the sampling site. The red stars represent some industries near the research area.
